# Supplementary material for: Maternal Choline Supplementation Alters Fetal Growth Patterns in a Mouse Model of Placental Insufficiency
Source: MDPI journal article supplement (doi:10.3390/nu9070765), 2017-07-18
Supplement: s1 [file s1]

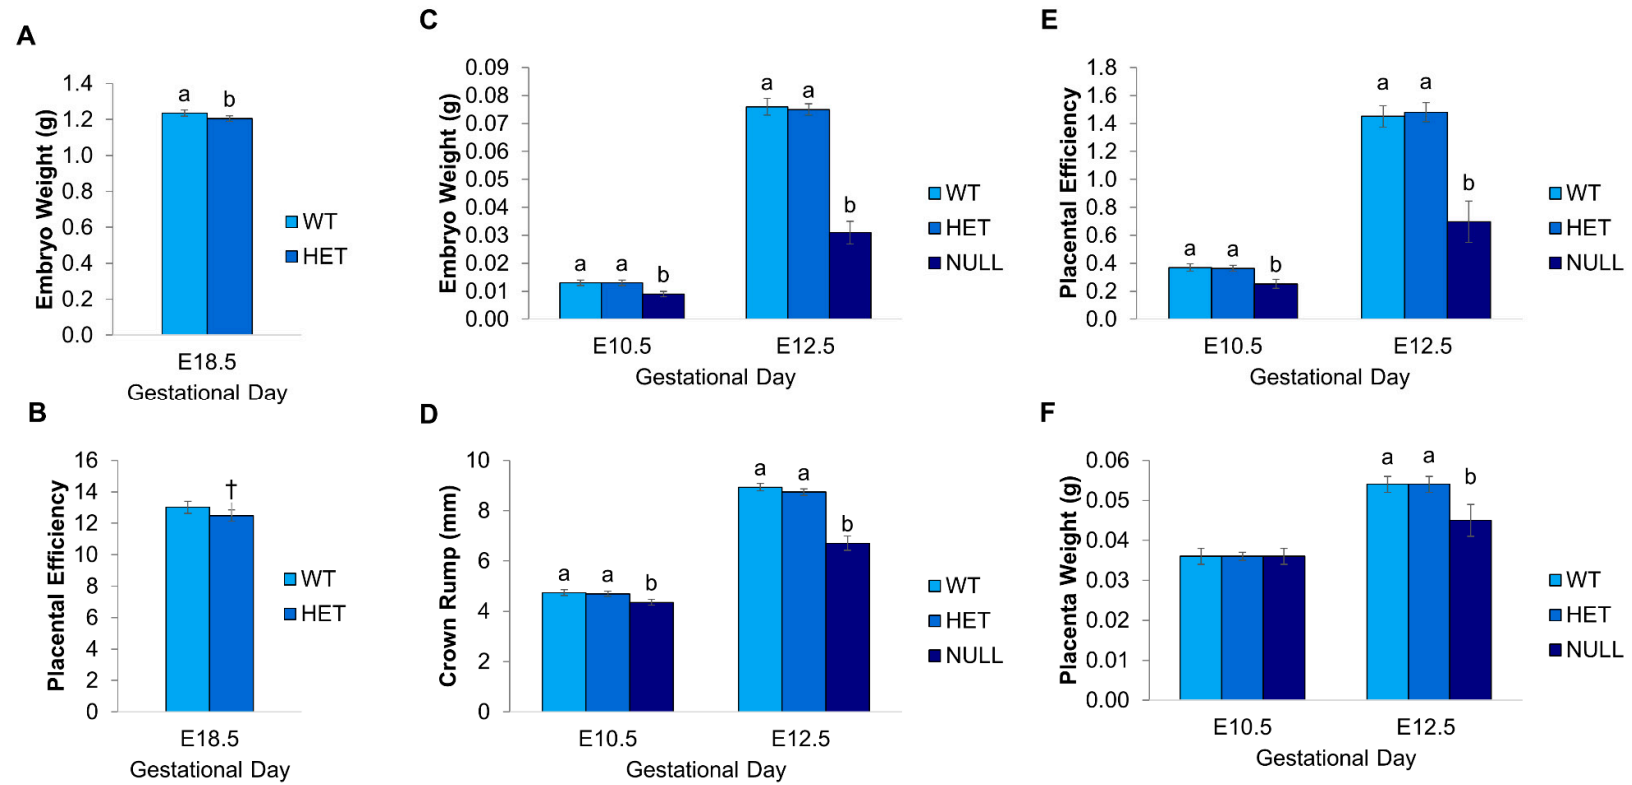

**Supplementary Figure S1.** Fetal and placental growth characteristics differ by *Dlx3* genotype. Embryo weight (A) and placental efficiency (B) at E18.5. Embryo weight (C), Crown rump length (D), placental efficiency (E), and placental weight (F) at E10.5 and E12.5. Placental efficiency defined as embryo weight/placental weight. Data were analyzed using mixed linear models controlling for choline treatment, maternal ID, fetal sex, and litter size. Values are presented as mean  $\pm$  SEM. Differing letters denotes  $P \leq 0.05$ . † denotes  $P < 0.10$ .

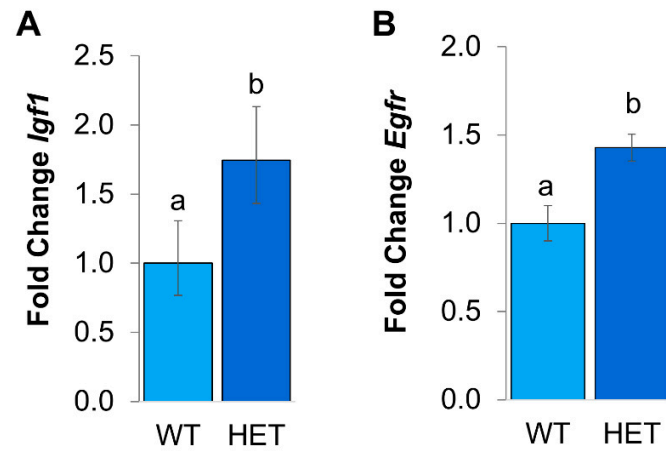

**Supplementary Figure S2.** Placental mRNA abundance of (A) *Igf1* and (B) *Egfr* at E10.5 by *Dlx3* genotype. Fold changes are expressed relative to the housekeeping gene *Tbp* with wildtypes normalized to 1. Data analyzed using mixed linear models controlling for choline treatment, maternal ID, fetal sex, and litter size. Log-transformed data (*Igf1*) is represented by back-transformed means and 95% confidence intervals. All other values are presented as mean  $\pm$  SEM. Differing letters denotes  $P \leq 0.05$ . † denotes  $P < 0.10$ .

**Table S1.** Primers for genotyping and RT-qPCR.

| <i>Gene</i>  | <i>Name</i>                           | <i>Reference Sequence</i> | <i>Primer Sequences</i>                                                                                                                        | <i>Annealing Temperature</i> |
|--------------|---------------------------------------|---------------------------|------------------------------------------------------------------------------------------------------------------------------------------------|------------------------------|
| <i>Dlx3</i>  | Distal-less homeobox 3                | NC_000077.6               | F: 5' GTGAACGGCAAGCCCAA 3'<br>R: (Wild type allele)<br>5' CTCTGTGACACGCCATACACAGTT 3'<br>R: (Knockout allele)<br>5' AAAGGCCCGGAGATGAGGAAGAG 3' | Touchdown<br>from 63° to 49° |
| <i>Sry</i>   | Sex determining region Y              | NC_000087.7               | F: 5' TGGGACTGGTGACAATTGTC 3'<br>R: 5' GAGTACAGGTGTGCAGCTCT 3'                                                                                 | 60°C                         |
| <i>Igf1</i>  | Insulin-like growth factor 1          | NM_010512.5               | F: 5' GACCGAGGGGCTTTTACTTC 3'<br>R: 5' CATCCACAATGCCTGTCTGA 3'                                                                                 | 63°C                         |
| <i>Igf2</i>  | Insulin-like growth factor 2          | NM_010514.3               | F: 5' CGCTTCAGTTTGTCTGTTCG 3'<br>R: 5' GCAGCACTCTTCCACGATG 3'                                                                                  | 63°C                         |
| <i>Igf1r</i> | Insulin-like growth factor receptor 1 | NM_010513.2               | F: 5' GCTTCGTTATCCACGACGATG 3'<br>R: 5' GAATGGCGGATCTTCACGTAG 3'                                                                               | 63°C                         |
| <i>Igf2r</i> | Insulin-like growth factor receptor 2 | NM_010515.2               | F: 5' TCTGTGTTGGCTCGTCACTC 3'<br>R: 5' CCGGTGACAGACGTTGATGA 3'                                                                                 | 63°C                         |
| <i>Egfr</i>  | Epidermal growth factor receptor      | NM_207655.2               | F: 5' GGAAGTGTGTCTCCTGCCAGAAT 3'<br>R: 5' GGCAGACATTCTGGATGGCACT 3'                                                                            | 63°C                         |
| <i>Tbp</i>   | TATA-binding protein                  | NM_013684.3               | F: 5' AGGAGCCAAGAGTGAAGAACAA 3'<br>R: 5' AACTTCACATCACAGCTCCCC 3'                                                                              | 60°C                         |

**Table S2.** Litter size, resorptions, total implantations and fetal body composition in litters born to *Dlx3*<sup>+/-</sup> dams in response to three different maternal choline treatments (1X control, 2X and 4X) at E10.5, E12.5, E15.5 and E18.5. For litter size, implantations and % resorptions, data were analyzed using ANOVA. For body composition, data was analyzed using mixed linear models controlling for fetal genotype, maternal ID, fetal sex, and litter size and represented as % of total body weight. Values are presented as mean ± SEM.

| Time point           | Diet | Implantations | % Resorptions | Litter size | Fetal water content (%) | Fetal lipid content (%) | Fetal protein content (%) |
|----------------------|------|---------------|---------------|-------------|-------------------------|-------------------------|---------------------------|
| <b>E10.5</b>         | 1X   | 12.3 ± 0.8    | 43.6 ± 5.7    | 7.2 ± 1.1   |                         |                         |                           |
|                      | 2X   | 12.4 ± 1.0    | 34.6 ± 6.9    | 8.3 ± 1.3   | -                       | -                       | -                         |
|                      | 4X   | 13.2 ± 0.9    | 47.6 ± 6.0    | 7.0 ± 1.1   |                         |                         |                           |
| <i>P (Treatment)</i> |      | 0.722         | 0.731         | 0.371       |                         |                         |                           |
| <b>E12.5</b>         | 1X   | 10.6 ± 1.0    | 55.6 ± 6.3    | 5.1 ± 1.0   |                         |                         |                           |
|                      | 2X   | 10.2 ± 1.1    | 50.2 ± 6.9    | 5.3 ± 1.1   | -                       | -                       | -                         |
|                      | 4X   | 12.7 ± 1.0    | 50.6 ± 6.3    | 6.3 ± 1.0   |                         |                         |                           |
| <i>P (Treatment)</i> |      | 0.631         | 0.198         | 0.804       |                         |                         |                           |
| <b>E15.5</b>         | 1X   | 11.9 ± 1.2    | 58.0 ± 5.1    | 4.9 ± 0.6   |                         |                         |                           |
|                      | 2X   | 10.6 ± 1.2    | 60.4 ± 5.1    | 3.8 ± 0.6   | -                       | -                       | -                         |
|                      | 4X   | 12.4 ± 1.2    | 51.9 ± 5.1    | 5.8 ± 0.6   |                         |                         |                           |
| <i>P (Treatment)</i> |      | 0.100         | 0.549         | 0.491       |                         |                         |                           |
| <b>E18.5</b>         | 1X   | 12.8 ± 0.9    | 52.9 ± 7.8    | 5.9 ± 0.9   | 83.8 ± 0.35             | 0.91 ± 0.8              | 10.5 ± 1.2                |
|                      | 2X   | 11.0 ± 0.9    | 53.4 ± 7.4    | 4.8 ± 0.8   | 83.8 ± 0.33             | 1.87 ± 0.7              | 10.7 ± 1.1                |
|                      | 4X   | 12.1 ± 0.9    | 52.0 ± 7.8    | 5.6 ± 0.9   | 84.1 ± 0.34             | 1.27 ± 0.8              | 11.7 ± 1.2                |
| <i>P (Treatment)</i> |      | 0.644         | 0.359         | 0.991       | 0.552                   | 0.377                   | 0.437                     |

**Table S3.** Genotype distributions in offspring born to *Dlx3*<sup>+/-</sup> dams in response to three different maternal choline treatments (control, 2X and 4X) at E10.5, E12.5, E15.5 and E18.5. 2-tailed P values; Fisher's exact test.

| Time point   | Diet            | Embryo Genotype (%) |            |            | P value (vs. Ctrl) |
|--------------|-----------------|---------------------|------------|------------|--------------------|
|              |                 | WT                  | HET        | NULL       |                    |
| <b>E10.5</b> | 1X              | 14 (21.5%)          | 35 (53.8%) | 16 (24.6%) | 0.20               |
|              | 2X              | 13 (25.0%)          | 33 (63.5%) | 6 (11.5%)  |                    |
|              | 4X              | 10 (17.2%)          | 33 (56.9%) | 15 (25.9%) |                    |
|              | <i>Expected</i> | 25%                 | 50%        | 25%        | 0.86               |
| <b>E12.5</b> | 1X              | 23 (38.3%)          | 34 (56.7%) | 3 (5.0%)   | 0.35               |
|              | 2X              | 21 (40.4%)          | 31 (59.5%) | 0 (0.0%)   |                    |
|              | 4X              | 18 (24.3%)          | 49 (66.2%) | 7 (9.5%)   |                    |
|              | <i>Expected</i> | 33%                 | 67%        | 0%         | 0.17               |
| <b>E15.5</b> | 1X              | 22 (40.0%)          | 33 (60.0%) | -          | 1.0                |
|              | 2X              | 15 (39.5%)          | 23 (60.5%) | -          |                    |
|              | 4X              | 24 (39.3%)          | 37 (60.7%) | -          |                    |
|              | <i>Expected</i> | 33%                 | 67%        | 0%         | 1.0                |
| <b>E18.5</b> | 1X              | 18 (34.0%)          | 35 (66.0%) | -          | 0.70               |
|              | 2X              | 22 (37.9%)          | 36 (62.1%) | -          |                    |
|              | 4X              | 15 (30.0%)          | 35 (70.0%) | -          |                    |
|              | <i>Expected</i> | 33%                 | 67%        | 0%         | 0.68               |

**Table S4.** Embryo weight, placental weight, crown rump length, and placental efficiency by *Dlx3* genotype at E12.5 and E15.5. Data were analyzed using mixed linear models controlling for maternal ID, fetal sex, and litter size. Values are presented as mean  $\pm$  SEM. # $P < 0.1$  vs. 1X controls. \* $P < 0.05$  vs. 2X. n=7-10 dams per treatment, per time point. Values are presented as mean  $\pm$  SEM.

| Time point | Genotype | Diet | Embryo Weight      | Placenta Weight    | Crown Rump Length | Placental Efficiency |
|------------|----------|------|--------------------|--------------------|-------------------|----------------------|
| E12.5      | WT       | 1X   | 0.080 $\pm$ 0.004  | 0.058 $\pm$ 0.003  | 9.00 $\pm$ 0.2    | 1.48 $\pm$ 0.1       |
|            |          | 2X   | 0.076 $\pm$ 0.004  | 0.054 $\pm$ 0.003  | 8.69 $\pm$ 0.3    | 1.39 $\pm$ 0.1       |
|            |          | 4X   | 0.071 $\pm$ 0.004  | 0.050 $\pm$ 0.003# | 9.13 $\pm$ 0.2    | 1.49 $\pm$ 0.1       |
|            | HET      | 1X   | 0.076 $\pm$ 0.004  | 0.057 $\pm$ 0.003  | 8.89 $\pm$ 0.2    | 1.49 $\pm$ 0.1       |
|            |          | 2X   | 0.083 $\pm$ 0.004  | 0.053 $\pm$ 0.003  | 8.76 $\pm$ 0.2    | 1.67 $\pm$ 0.2       |
|            |          | 4X   | 0.068 $\pm$ 0.004* | 0.052 $\pm$ 0.003  | 8.65 $\pm$ 0.2    | 1.35 $\pm$ 0.1       |
|            | NULL     | 1X   | 0.020 $\pm$ 0.007  | 0.037 $\pm$ 0.007  | 5.82 $\pm$ 1.0    | 0.68 $\pm$ 0.2       |
|            |          | 2X   | -                  | -                  | -                 | -                    |
|            |          | 4X   | 0.023 $\pm$ 0.004  | 0.047 $\pm$ 0.004  | 6.64 $\pm$ 0.4    | 0.50 $\pm$ 0.1       |
| E15.5      | WT       | 1X   | 0.39 $\pm$ 0.02    | 0.098 $\pm$ 0.005  | 14.87 $\pm$ 0.4   | 4.14 $\pm$ 0.4       |
|            |          | 2X   | 0.40 $\pm$ 0.03    | 0.084 $\pm$ 0.006  | 15.18 $\pm$ 0.3   | 4.84 $\pm$ 0.4       |
|            |          | 4X   | 0.39 $\pm$ 0.03    | 0.095 $\pm$ 0.005  | 14.88 $\pm$ 0.3   | 4.23 $\pm$ 0.4       |
|            | HET      | 1X   | 0.38 $\pm$ 0.02    | 0.094 $\pm$ 0.005  | 14.65 $\pm$ 0.2   | 4.11 $\pm$ 0.2       |
|            |          | 2X   | 0.42 $\pm$ 0.03    | 0.087 $\pm$ 0.006  | 14.58 $\pm$ 0.3   | 4.80 $\pm$ 0.3#      |
|            |          | 4X   | 0.39 $\pm$ 0.02    | 0.091 $\pm$ 0.005  | 14.91 $\pm$ 0.2   | 4.44 $\pm$ 0.2       |
